# Supplementary material for: Safety Built Right in: Exploring the Occupational Health and Safety Potential of BIM-Based Platforms throughout the Building Lifecycle
Source: MDPI journal article supplement (doi:10.3390/su14106104), 2022-05-17
Supplement: s1 [file s1]

Supplementary Material

**Table S1.** Summarized literature review characteristics of the 51 included papers reporting BIM applications in occupational health and safety.

| Literature Source             | Country       | Building Type | Data Sources                                                   | Hazards                  | Solution Type                                       | Building Model | Linked Technologies | Phases                                                   | Users of Solution                                     | Beneficiaries of Solution | Facilitating factors for adoption                                           | Barriers                                                                                                    |
|-------------------------------|---------------|---------------|----------------------------------------------------------------|--------------------------|-----------------------------------------------------|----------------|---------------------|----------------------------------------------------------|-------------------------------------------------------|---------------------------|-----------------------------------------------------------------------------|-------------------------------------------------------------------------------------------------------------|
| Alizadehsalehi et al. (2020). | Turkey, USA   | Not specified | Experience, Safety Guidelines & Industry Reports, Measurements | Not specified            | Site Layout & Task Planning<br>Real-Time Monitoring | 4D BIM         | Drones              | Construction Planning,<br>Construction Execution         | Designer, construction manager, safety manager        | Construction workers      | Integrated project team structures                                          | Increased upfront resource needs<br>Technological immaturity<br>Regulatory boundaries                       |
| Arslan, et al. 2019           | France        | Not specified | Measurements                                                   | Intrusions & Near-Misses | Site Layout & Task Planning<br>Real-Time Monitoring | 3D BIM         | Bluetooth Beacons   | Construction Planning,<br>Construction Execution         | Safety manager, construction manager                  | Construction workers      | N/A                                                                         | N/A                                                                                                         |
| Arslan, et al 2019b           | France        | Not specified | Measurements                                                   | Intrusions & Near-Misses | Real-Time Monitoring                                | 3D BIM         | Bluetooth Beacons   | Construction Execution                                   | Safety manager, construction manager                  | Construction workers      | N/A                                                                         | Isolated use cases<br>Static information in BIM                                                             |
| Arslan, et al. 2014           | Pakistan, USA | Not specified | Measurements                                                   | Health Damages           | Real-Time Monitoring                                | 3D BIM         | IoT Sensors         | Construction Execution                                   | Safety manager, construction manager                  | Construction workers      | High degree of software interoperability<br>Use of established BIM software | Limited user-friendliness                                                                                   |
| Brosque et al. 2021           | USA, Norway   | Commercial    | Others                                                         | Health Damages           | Task Performance by Robots                          | 3D BIM         | Robots              | Design, Construction Planning,<br>Construction Execution | Robotic start-up, construction manager, subcontractor | Construction workers      | Extension of BIM use cases<br>Innovation mindset                            | Resistance to change<br>Need for organizational changes<br>Increased upfront resource needs<br>High quality |

| Requirements for BIM     |            |                  |                                      |                          |                                                                     |           |                    |                                               |                   |                      |                                                                                           | requirements for BIM                                                        |
|--------------------------|------------|------------------|--------------------------------------|--------------------------|---------------------------------------------------------------------|-----------|--------------------|-----------------------------------------------|-------------------|----------------------|-------------------------------------------------------------------------------------------|-----------------------------------------------------------------------------|
| Author                   | Country    | Project Type     | Source of Information                | Information Type         | Application                                                         | BIM Level | Other Technologies | Application Phase                             | Responsible Party | Target Group         | Other Factors                                                                             | Findings                                                                    |
| Choe and Leite, 2017     | Korea, USA | Commercial       | Experience Historical Data           | Not specified            | Site Layout & Task Planning                                         | 4D BIM    | -                  | Construction Planning, Construction Execution | Safety manager    | Construction workers |                                                                                           | Static information in BIM<br>Lack of technical skills                       |
| Cortés-Pérez et al. 2020 | Spain      | Not specified    | Safety Guidelines & Industry Reports | Not specified            | Site Layout & Task Planning                                         | 3D BIM    | -                  | Construction Planning                         | Safety manager    | Construction workers | Use of established BIM software<br>Use of established standards<br>Regulatory obligations | Lack of technical skills                                                    |
| Costin et al. 2015       | USA        | Other (hospital) | Measurements                         | Intrusions & Near-Misses | Real-Time Monitoring                                                | 3D BIM    | RFID               | Construction Execution                        | Safety manager    | Construction workers | N/A                                                                                       | Integrity concerns                                                          |
| Deng et al. 2019         | China      | Residential      | Experience                           | Falling Struck-By        | Design for Safety<br>Safety Training<br>Site Layout & Task Planning | 4D BIM    | -                  | Construction Planning                         | Safety manager    | Construction workers | High degree of software interoperability                                                  | N/A                                                                         |
| Ding et al. 2016         | China, UK  | Commercial       | Historical Data                      | Not specified            | Safety Training<br>Site Layout & Task Planning                      | 4D BIM    | -                  | Construction Planning, Construction Execution | Safety manager    | Construction workers | N/A                                                                                       | Lack of technical skills<br>Human intervention needed for quality assurance |

|                      |                    |                      |                                                         |                                      |                                                  |        |                 |                                                                  |                                          |                                           |                                                                                   |                                                                                          |
|----------------------|--------------------|----------------------|---------------------------------------------------------|--------------------------------------|--------------------------------------------------|--------|-----------------|------------------------------------------------------------------|------------------------------------------|-------------------------------------------|-----------------------------------------------------------------------------------|------------------------------------------------------------------------------------------|
| Fang et al. 2016     | USA                | Commercial           | Measurements                                            | Intrusions & Near-Misses             | Real-Time Monitoring                             | 3D BIM | RFID            | Construction Execution                                           | Safety manager                           | Construction workers                      | Complementary IT infrastructure                                                   | Technological immaturity, Need for complementary infrastructure                          |
| Getuli et al. 2020a  | Italy              | Commercial           | Worker Characteristics<br>Others                        | Not specified                        | Safety Training<br>Site Layout & Task Planning   | 4D BIM | Virtual Reality | Construction Planning                                            | Construction manager, safety manager     | Construction workers                      | High user-friendliness<br>Low implementation costs<br>Accessibility of technology | Lack of technical skills<br>Lack of evaluation metrics                                   |
| Getuli et al. 2020b  | Italy, Israel      | Commercial           | Experience<br>Worker Characteristics<br>Others          | Not specified                        | Safety Training<br>Site Layout & Task Planning   | 4D BIM | Virtual Reality | Construction Planning                                            | Construction manager, safety manager     | Construction workers                      | High user-friendliness                                                            | Lack of technical skills<br>Limited transferability of training situations to real world |
| Golovina et al. 2016 | Germany, USA       | Not specified        | Measurements                                            | Struck-By Intrusions & Near-Misses   | Site Layout & Task Planning                      | 3D BIM | GPS             | Construction Planning, Construction Execution                    | Safety manager                           | Construction workers                      | N/A                                                                               | Technological immaturity<br>Static information in BIM                                    |
| Hossain et al. 2018  | Singapore          | Commercial           | Experience                                              | Not specified                        | Design for Safety<br>Site Layout & Task Planning | 4D BIM | -               | Design, Construction Planning, Construction Execution, Operation | Designer, safety manager                 | Construction workers, maintenance workers | N/A                                                                               | N/A                                                                                      |
| Jin et al 2017       | China, USA, Canada | Not specified        | Safety Guidelines & Industry Reports<br>Historical Data | Falling Caught-In/Between Situations | Equipment & Temporary Structures                 | 3D BIM | -               | Construction Planning                                            | Designer, safety manager                 | Construction workers                      | N/A                                                                               | N/A                                                                                      |
| Jin et al. 2019      | USA                | Other (kindergarten) | Experience                                              | Not specified                        | Design for Safety                                | 4D BIM | -               | Design, Construction Planning                                    | Designer, engineer, construction manager | Construction workers                      | Integrated project team structures                                                | Limited scope of hazard recognition                                                      |

|                     |               |                                                                                             |                                                                  |                                                    |                                                                   |        |            |                                                          |                                               |                                                 |                                                                             |                                                                                                                              |
|---------------------|---------------|---------------------------------------------------------------------------------------------|------------------------------------------------------------------|----------------------------------------------------|-------------------------------------------------------------------|--------|------------|----------------------------------------------------------|-----------------------------------------------|-------------------------------------------------|-----------------------------------------------------------------------------|------------------------------------------------------------------------------------------------------------------------------|
| Khan et al.<br>2020 | Korea         | Commercial                                                                                  | Safety<br>Guidelines &<br>Industry<br>Reports                    | Fires &<br>Explosions                              | Learning &<br>Documentatio<br>n<br>Site Layout &<br>Task Planning | 3D BIM | Blockchain | Constructio<br>n Planning,<br>Constructio<br>n Execution | Safety<br>manager                             | Construction<br>workers,<br>safety<br>inspector | N/A                                                                         | N/A                                                                                                                          |
| Kim et al.<br>2015  | Korea         | Residential                                                                                 | Historical Data                                                  | Not<br>specified                                   | Learning &<br>Documentatio<br>n<br>Site Layout &<br>Task Planning | 3D BIM | -          | Constructio<br>n Planning,<br>Constructio<br>n Execution | Safety<br>manager                             | Construction<br>workers                         | High degree of<br>software<br>interoperability                              | High degree of<br>manual work<br>Limited scope<br>of hazard<br>recognition                                                   |
| Kim, et al.<br>2016 | USA,<br>Korea | Other<br>(university)                                                                       | Measurements<br>Others                                           | Intrusions<br>& Near-<br>Misses                    | Site Layout &<br>Task Planning                                    | 4D BIM | RFID       | Constructio<br>n Planning,<br>Constructio<br>n Execution | Safety<br>manager                             | Construction<br>workers                         | N/A                                                                         | Lack of<br>evaluation<br>metrics<br>Technological<br>immaturity                                                              |
| Kim et al.<br>2020  | Korea         | Commercial                                                                                  | Safety<br>Guidelines &<br>Industry<br>Reports<br>Historical Data | Falling                                            | Site Layout &<br>Task Planning                                    | 3D BIM | -          | Design,<br>Constructio<br>n Planning                     | Architect,<br>safety<br>manager               | Construction<br>workers                         | Use of other<br>technologies to<br>overcome BIM-<br>inherent<br>limitations | Limited input<br>data<br>Lack of<br>evaluation<br>metrics<br>Static<br>information in<br>BIM                                 |
| Kim et al.<br>2015  | USA,<br>Korea | Other (water<br>park,<br>fabrication<br>facility),<br>residential<br>(multifamily<br>house) | Others                                                           | Falling<br>Caught-<br>In/Betwee<br>n<br>Situations | Equipment &<br>Temporary<br>Structures                            | 4D BIM | -          | Constructio<br>n Planning                                | Designer,<br>safety<br>manager                | Construction<br>workers                         | N/A                                                                         | N/A                                                                                                                          |
| Kim et al.<br>2016  | USA           | Commercial                                                                                  | Experience                                                       | Falling<br>Caught-<br>In/Betwee<br>n<br>Situations | Equipment &<br>Temporary<br>Structures                            | 4D BIM | -          | Constructio<br>n Planning                                | Safety<br>manager,<br>construction<br>manager | Construction<br>workers,<br>safety<br>inspector | N/A                                                                         | High degree of<br>manual work<br>Limited scope<br>of hazard<br>recognition<br>Isolated use<br>cases<br>Limited input<br>data |

|                      |                      |                  |                                                             |                                                                                |                                                     |        |                           |                        |                                           |                                           |                                                                |                                                                                        |
|----------------------|----------------------|------------------|-------------------------------------------------------------|--------------------------------------------------------------------------------|-----------------------------------------------------|--------|---------------------------|------------------------|-------------------------------------------|-------------------------------------------|----------------------------------------------------------------|----------------------------------------------------------------------------------------|
| Kim and Teizer, 2014 | USA                  | Other (hospital) | Experience Safety Guidelines & Industry Reports             | Falling Caught-In/Between Situations                                           | Equipment & Temporary Structures                    | 4D BIM | -                         | Construction Planning  | Architect, engineer, construction manager | Construction workers                      | Use of other technologies to overcome BIM-inherent limitations | Static information in BIM<br>Limited scope of hazard recognition<br>Limited input data |
| Lee et al. 2019      | China, Taiwan        | Residential      | Experience Academic Literature                              | Not specified                                                                  | Equipment & Temporary Structures                    | 3D BIM | -                         | Construction Planning  | Safety manager                            | Construction workers                      | N/A                                                            | N/A                                                                                    |
| Lee et al. 2020      | Korea                | Not specified    | Safety Guidelines & Industry Reports<br>Academic Literature | Falling Struck-By Caught-In/Between Situations                                 | Site Layout & Task Planning                         | 3D BIM | -                         | Design                 | Designer                                  | Construction workers                      | N/A                                                            | Regulatory boundaries<br>Limited input data<br>Lack of evaluation metrics              |
| Li et al. 2015       | Hong Kong, Australia | Residential      | Experience Historical Data Measurements                     | Falling Struck-By                                                              | Safety Training Real-Time Monitoring                | 3D BIM | -                         | Construction Execution | Safety manager                            | Construction workers, maintenance workers | N/A                                                            | Limited scope of hazard recognition                                                    |
| Liu et al. 2020      | USA                  | Residential      | Safety Guidelines & Industry Reports<br>Measurements        | Falling                                                                        | Site Layout & Task Planning<br>Real-Time Monitoring | 3D BIM | Indoor Positioning System | Construction Execution | Safety manager                            | Construction workers                      | N/A                                                            | N/A                                                                                    |
| Liu et al. 2020      | China                | Others (stadium) | Measurements                                                | Caught-In/Between Situations<br>Intrusions & Near-Misses<br>Fires & Explosions | Real-Time Monitoring                                | 3D BIM | IoT Sensors               | Operation              | Safety manager                            | Building occupants                        | Extension of BIM use cases                                     | N/A                                                                                    |

|                      |               |               |                                                                   |                          |                                                                                                    |        |                         |                                                          |                                      |                                         |                                                                    |                                                                                                                                 |
|----------------------|---------------|---------------|-------------------------------------------------------------------|--------------------------|----------------------------------------------------------------------------------------------------|--------|-------------------------|----------------------------------------------------------|--------------------------------------|-----------------------------------------|--------------------------------------------------------------------|---------------------------------------------------------------------------------------------------------------------------------|
| Melzner et al. 2013  | Germany , USA | Commercial    | Safety Guidelines & Industry Reports                              | Falling                  | Equipment & Temporary Structures                                                                   | 3D BIM | -                       | Constructio<br>n Planning                                | Safety manager                       | Construction workers                    | N/A                                                                | High degree of manual work<br>Static information in BIM<br>Limited scope of hazard recognition                                  |
| Mirahadi et al. 2013 | Canada        | Commercial    | Safety Guidelines & Industry Reports                              | Fires & Explosions       | Design for Safety                                                                                  | 3D BIM | -                       | Design                                                   | Designer                             | Building occupants, maintenance workers | High degree of software interoperability                           | N/A                                                                                                                             |
| Park et al. 2013     | Korea         | Commercial    | Safety Guidelines & Industry Reports<br>Historical Data<br>Others | Not specified            | Learning & Documentation<br>Safety Training<br>Site Layout & Task Planning<br>Real-Time Monitoring | 3D BIM | RFID, Augmented Reality | Constructio<br>n Planning,<br>Constructio<br>n Execution | Safety manager                       | Construction workers                    | High user-friendliness<br>High degree of software interoperability | Lack of technical skills<br>Limited depth of hazard recognition<br>Technological immaturity                                     |
| Park et al. 2017     | USA           | Not specified | Experience Measurements                                           | Intrusions & Near-Misses | Real-Time Monitoring                                                                               | 3D BIM | Bluetooth Beacons       | Constructio<br>n Execution                               | Construction manager                 | Construction workers                    | N/A                                                                | N/A                                                                                                                             |
| Pham et al. 2020     | Korea         | Residential   | Safety Guidelines & Industry Reports                              | Falling                  | Site Layout & Task Planning                                                                        | 4D BIM | -                       | Constructio<br>n Planning                                | Safety manager, construction manager | Construction workers                    | N/A                                                                | Human intervention needed for quality assurance, Limited input data, Regulatory boundaries, Limited depth of hazard recognition |
| Qi et al. 2014       | USA           | Not specified | Experience                                                        | Falling                  | Design for Safety                                                                                  | 3D BIM | -                       | Design, Constructio<br>n Planning                        | Designer                             | Construction workers                    | N/A                                                                | Limited depth of hazard recognition                                                                                             |

|                         |               |                              |                                                                    |                                        |                                                                                                         |        |                      |                                   |                                                     |                      |                                                       |                                                                                                                                                           |
|-------------------------|---------------|------------------------------|--------------------------------------------------------------------|----------------------------------------|---------------------------------------------------------------------------------------------------------|--------|----------------------|-----------------------------------|-----------------------------------------------------|----------------------|-------------------------------------------------------|-----------------------------------------------------------------------------------------------------------------------------------------------------------|
| Riaz et al. 2014        | Pakistan, USA | Not specified                | Safety Guidelines & Industry Reports<br>Academic Literature        | Caught-In/Between Situations           | Real-Time Monitoring                                                                                    | 3D BIM | IoT Sensors          | Construction Execution, Operation | Safety manager, construction manager                | Construction workers | Complementary IT infrastructure                       | Increased upfront resource needs<br>Lack of technical skills<br>Need for complementary infrastructure<br>Resistance to change<br>Technological immaturity |
| Shen et al. 2016        | USA           | Others (university building) | Historical Data                                                    | Intrusions & Near-Misses               | Learning & Documentation                                                                                | 3D BIM | -                    | Construction Execution            | Safety manager                                      | Construction workers | N/A                                                   | Limited input data<br>High degree of manual work                                                                                                          |
| Sun and Turkan, 2020    | USA           | Other (night club)           | Historical Data                                                    | Fires & Explosions                     | Design for Safety                                                                                       | 3D BIM | -                    | Design                            | Architect                                           | Building occupants   | Access to as-built drawings and usage characteristics | Technological immaturity                                                                                                                                  |
| Wang et al. 2015        | USA, Germany  | Not specified                | Experience<br>Safety Guidelines & Industry Reports<br>Measurements | Struck-By Caught-In/Between Situations | Site Layout & Task Planning<br>Equipment & Temporary Structures                                         | 3D BIM | Point Cloud Scanning | Construction Planning             | Construction manager, safety manager, subcontractor | Construction workers | N/A                                                   | N/A                                                                                                                                                       |
| Wang et al. 2015        | Taiwan        | Others (research institute)  | Safety Guidelines & Industry Reports                               | Fires & Explosions                     | Design for Safety<br>Safety Training<br>Site Layout & Task Planning<br>Equipment & Temporary Structures | 3D BIM | -                    | Design, Operation                 | Designer, facility manager                          | Maintenance workers  | N/A                                                   | N/A                                                                                                                                                       |
| Wetzel and Thabet, 2016 | USA           | Not specified                | Experience<br>Safety Guidelines & Industry Reports                 | Not specified                          | Learning & Documentation                                                                                | 3D BIM | -                    | Operation                         | Facility manager                                    | Maintenance workers  | N/A                                                   | N/A                                                                                                                                                       |

| Academic Literature     |                         |                     |                                                 |                                  |                                            |               |   |                                               |                                      |                      |                                 |                                                                                   |
|-------------------------|-------------------------|---------------------|-------------------------------------------------|----------------------------------|--------------------------------------------|---------------|---|-----------------------------------------------|--------------------------------------|----------------------|---------------------------------|-----------------------------------------------------------------------------------|
| Wetzel and Thabet, 2015 | USA                     | Not specified       | Experience                                      | Not specified                    | Learning & Documentation                   | 3D BIM        | - | Operation                                     | Facility manager                     | Maintenance workers  | N/A                             | N/A                                                                               |
| Wetzel and Thabet, 2018 | USA                     | Not specified       | Experience                                      | Falling Struck-By Health Damages | Learning & Documentation                   | 3D BIM        | - | Design, Construction Execution, Operation     | Construction manager                 | Maintenance workers  | Use of established BIM software | High degree of manual work                                                        |
| Yi et al 2014           | China, Spain            | Not specified       | Others                                          | Not specified                    | Site Layout & Task Planning                | 4D BIM        | - | Construction Planning                         | Safety manager                       | Construction workers | N/A                             | N/A                                                                               |
| Yuan et al 2019         | China, USA              | Not specified       | Academic literature                             | Not specified                    | Design for Safety Learning & Documentation | 4D BIM        | - | Design                                        | Designer, architect, engineer        | Construction workers | N/A                             | N/A                                                                               |
| Zhang et al. 2015       | USA, Australia, Germany | Not specified       | Experience                                      | Not specified                    | Learning & Documentation                   | Not specified | - | Construction Planning                         | Safety manager                       | Construction workers | N/A                             | N/A                                                                               |
| Zhang et al. 2015       | USA, Finland, Germany   | Office, residential | Experience Safety Guidelines & Industry Reports | Falling                          | Site Layout & Task Planning                | 4D BIM        | - | Construction Planning, Construction Execution | Safety manager, construction manager | Construction workers | N/A                             | High quality requirements for BIM Human intervention needed for quality assurance |
| Zhang et al. 2013       | USA, Korea              | Not specified       | Experience Safety Guidelines &                  | Falling                          | Site Layout & Task Planning                | 4D BIM        | - | Construction Planning, Construction Execution | Engineer, construction manager,      | Construction workers | N/A                             | N/A                                                                               |



| Author           | Country | Project Type   | Data Source                                   |               | Data Type                   |               |               | Application            | Participants                                                       |                      |                                                                     |                                                                       | Limitations |
|------------------|---------|----------------|-----------------------------------------------|---------------|-----------------------------|---------------|---------------|------------------------|--------------------------------------------------------------------|----------------------|---------------------------------------------------------------------|-----------------------------------------------------------------------|-------------|
|                  |         |                | Industry Reports                              | Other         | Experience                  | Not specified | Task Planning |                        | Architect                                                          | Construction workers | Integrated project team structures, complementary IT infrastructure |                                                                       |             |
| Tran et al. 2021 | Korea   | Other (school) | Experience Historical Data                    | Not specified | Site Layout & Task Planning | 4D BIM        | -             | Construction Planning  | Architect, engineer, construction manager, subcontractor, supplier | Construction workers | Integrated project team structures, complementary IT infrastructure | Limited scope of hazard recognition<br>Static information in BIM      |             |
| Lu et al. 2021   | China   | Residential    | Historical Data                               | Not specified | Design for Safety           | 3D BIM        | -             | Design                 | Architect, engineer                                                | Construction workers | Integrated project team structures                                  | Limited depth of hazard recognition                                   |             |
| Liu et al. 2021  | China   | Commercial     | Experience, Measurements, Academic Literature | Struck-By     | Real-Time Monitoring        | 3D BIM        | IoT Sensors   | Construction Execution | Construction manager                                               | Construction workers | N/A                                                                 | Limited input data<br>Human intervention needed for quality assurance |             |
